# Supplementary material for: Improved H2O2 photogeneration on Rb-doped-polymeric carbon nitride via enhanced O2 adsorption
Source: Royal Society of Chemistry journal article supplement (doi:10.1039/d3ta00196b), 2023-01-01
Supplement: d3ta00196b1.pdf [file d3ta00196b1.pdf]

## Supporting information

### **Improved H<sub>2</sub>O<sub>2</sub> photogeneration on Rb-doped-polymeric carbon nitride *via* enhanced O<sub>2</sub> adsorption**

Zehao Li <sup>\*a,b †</sup>, Tianxiang Chen <sup>c †</sup>, Yufei Chen <sup>b</sup>, Xiaoyuan Chen <sup>b</sup>, Le Li <sup>b</sup>, Siya Kuang <sup>b</sup>, Jing Gao <sup>b</sup>, Yuxuan Guo <sup>b</sup>, Tsz Woon Benedict Lo <sup>c</sup>, Jimin Du <sup>b</sup>

<sup>a</sup> Guangdong Provincial Key Laboratory of Chemical Measurement and Emergency Test Technology, Institute of Analysis, Guangdong Academy of Sciences (China National Analytical Center, Guangzhou), Guangzhou 510070, China.

<sup>b</sup> School of Chemistry and Chemical Engineering, Anyang Normal University, Anyang 455000, China.

<sup>c</sup> State Key Laboratory of Chemical Biology and Drug Discovery, Department of Applied Biology and Chemical Technology, The Hong Kong Polytechnic University, Hunghom, Hong Kong, China

## Experimental Section

### Characterization

To analyze PCN structure, X-ray diffraction (XRD, Rigaku Corporation Ultima III), Fourier transform infrared spectroscopy (FT-IR, Thermo Scientific Nicolet iS50ATR), X-ray photoelectron spectroscopy (XPS, Thermo Scientific K-Alpha<sup>+</sup>), and solid-state <sup>13</sup>C nuclear magnetic resonance spectroscopy (NMR, Bruker Advance III 500 spectrometer) were performed. The morphology and specific surface area of the obtained PCN were characterized via scanning electron microscopy (SEM, Hitachi SU8010), transmission electron microscopes (TEM, FEI Talos F200X G2), and Brunauer–Emmett–Teller (BET) (Micrometrics Gemini VII 2390) analyses. The optical absorption properties and charge recombination of the obtained PCN were measured via ultraviolet–visible (UV–Vis, Shimadzu UV-2550 UV–vis spectrophotometer) and photoluminescence (PL, Edinburgh FLS980 spectrometer) spectroscopies (under excitation at 370 nm), respectively. The carrier lifetimes were determined at room temperature employing time-resolved PL (Edinburgh FLS980 spectrometer). The adsorptions of NH<sub>3</sub> and O<sub>2</sub> on catalysts were measured via temperature-programmed desorption (TPD) using a chemisorption analyzer (Chembet TPR/TPD Micromeritics 2920). The samples' electron paramagnetic resonance signal was tested using Bruker EMXplus-6/1 (at room temperature with dark and visible light).

### Photoelectrochemical measurement

The measurement of the rotating ring-disk electrode (RRDE, Pine Co. Ltd) was

conducted employing a three-electrode cell on a CHI 660E system. Ag/AgCl electrode was used as a reference electrode and carbon rod as a counter electrode. The ring potential of the ring-disk electrode was sustained at 1.40 V (vs. RHE). The linear sweep-voltammetry curves were acquired in an O<sub>2</sub>-saturated 0.10-M phosphate buffer solution (pH = 6.9) with 5 mV/s. The number of transferred electrons (*n*) and H<sub>2</sub>O<sub>2</sub> production selectivity (*s*) were calculated using the following equation:

$$n = 4 \times \frac{I_d}{I_d + I_r/N},$$

$$s = 2 \times \frac{I_r/N}{(I_d + I_r/N)} \times 100\%,$$

where *I<sub>d</sub>* and *I<sub>r</sub>* are disk and ring current, respectively. The collection efficiency (*N*) is determined to be 37%.

Electrochemical impedance spectroscopy (EIS), periodic on/off photocurrent response, and Mott–Schottky plots were tested on an electrochemical workstation (Chenhua CHI 660E, Shanghai) employing a conventional three-electrode system.

### **Photocatalytic H<sub>2</sub>O<sub>2</sub> production**

First, the photocatalytic H<sub>2</sub>O<sub>2</sub>-production properties of the obtained samples were screened on a multipass light catalytic reaction system (Perfectlight PCX50C Discover, Beijing) under white LED irradiation. A mass of 0.01-g photocatalyst was adequately dispersed in 50-mL ethanol solution (10 vol%), after which the solution was irradiated under white LED light (30.69 mW/cm<sup>2</sup>). The photocatalytic reaction was performed for 1 h at a 15-min interval for sample collection. The H<sub>2</sub>O<sub>2</sub>

concentration was determined with the colorimetric method, which is based on the peroxidase (POD)-catalyzed oxidation of N, N-diethyl-*p*-phenylenediamine (DPD) using H<sub>2</sub>O<sub>2</sub><sup>1</sup>. Namely, Briefly, 0.1 g of DPD was dissolved in 10 mL 0.05 M H<sub>2</sub>SO<sub>4</sub>, denoted as solution A. 10 mg of POD was dissolved in 10 mL water, denoted as solution B. 10 mL of 0.1 M Na<sub>2</sub>HPO<sub>4</sub> solution and 90 mL of 0.1 M NaH<sub>2</sub>PO<sub>4</sub> solution were mixed together to obtain solution C. 1 mL of centrifuged reaction solution, 1.25 mL of distilled water, 0.8 mL of solution C, 50 μL solution A and solution B are mixed. The time-dependent H<sub>2</sub>O<sub>2</sub> generation was measured as follows: 1 mL filtration from reaction solution was dispersed into solution D, which was monitored by the absorption of the solution at 551 nm and determined with UV-vis spectrophotometer. The calibration curve is prepared with a series of H<sub>2</sub>O<sub>2</sub> solutions with known concentrations.

Furthermore, the effects of different alcohols and biomasses on photocatalytic H<sub>2</sub>O<sub>2</sub> production employing CNR-0.5 were measured under white LED light irradiation. A mass of 0.01 g CNR-0.5 was dispersed in 50 mL of different aqueous solutions, including methanol (10 vol%), ethanol (10 vol%), isopropanol (10 vol%), glycerol (10 vol%), cyclohexanol (10 vol%), glucose (0.1 g), lactose (0.1 g), and D-cellobiose (0.1 g). The photocatalytic reaction was performed for 1 h at a 15-min interval for sample collection. The H<sub>2</sub>O<sub>2</sub> concentration was subsequently measured using the colorimetric method.

To further analyze the performance of samples, the photocatalytic H<sub>2</sub>O<sub>2</sub> production employing CNR-0.5 was measured and compared with that of CN using a

300-W Xe lamp comprising a 420-nm UV filter. The average light intensity was 100 mW/cm<sup>2</sup>. Mass of 0.04 g of each sample was dispersed in 200-mL aqueous ethanol (10 vol%). The photocatalytic process was performed for 12 h at an interval of 1 h for sample collection. The H<sub>2</sub>O<sub>2</sub> concentration was subsequently measured using the colorimetric method.

In order to explore the influence of oxygen on the H<sub>2</sub>O<sub>2</sub> generation activity, a mass of 0.01-g photocatalyst was adequately dispersed in 50-mL ethanol solution (10 vol%) or pure water. After that, O<sub>2</sub> was continuously injected into the solution for 10 min under dark conditions to make the O<sub>2</sub> saturated. After 10 min, the flow rate of O<sub>2</sub> was controlled to 300 mL/min. And then the solution was irradiated under white LED light (30.69 mW/cm<sup>2</sup>). The photocatalytic reaction was performed for 1 h at a 15-min interval for sample collection. The H<sub>2</sub>O<sub>2</sub> concentration was determined with the colorimetric method

The apparent quantum efficiency (AQE) of H<sub>2</sub>O<sub>2</sub> formed on CNR-0.5 under conditions of pure water and sacrificial agent were tested separately. The AQE test used a LED light with different wavelengths of 385 nm, 420 nm, 450 nm, 485 nm, and 520 nm (FWHM=15 nm). The AQE was calculated by the following formula:

$$AQE = \frac{2 \times H_2O_2 \text{ formed (mol)}}{\text{the number of incident photons (mol)}} \times 100\%$$

The solar-to-chemical conversion efficiency test was carried out with CNR-0.5 in pure water and sacrificial agent under LED white light. The solar-to-chemical conversion (SCC) efficiency is determined by the following formula:

$$SCC = \frac{[\Delta G_{H_2O_2}] \times [n_{H_2O_2}]}{I \times S \times T} \times 100\%$$

Where  $\Delta G_{H_2O_2}$ ,  $n_{H_2O_2}$ ,  $I$ ,  $S$ , and  $T$  represent the free energy for  $H_2O_2$  generation (117 KJ/mol), the molar amount of  $H_2O_2$  generated, the energy intensity of LED white light (30.69 mW/cm<sup>2</sup>), the irradiated sample area and the irradiation time (s).

### Density functional theory calculations

All calculations based on density functional theory (DFT) were performed using the Material Studio program<sup>2,3</sup>. The exchange–correlation effects were described by the generalized gradient approximation (GGA)<sup>4</sup> combined with the Perdew–Burke–Ernzerhof (PBE)<sup>5</sup>. The interactions between cores and valence electrons were treated with the projector augmented wave (PAW)<sup>6</sup>. During the calculations, the energy cutoff was set to 571.4 eV. Convergence thresholds of 10<sup>-5</sup> eV and 0.02 eV/Å were employed for energy and force, respectively. A large vacuum space of 15 Å was used to avoid the periodic boundary condition effects.

The adsorption energies  $\Delta E_{ads}$  were calculated from the following formula:

$$\Delta E_{ads} = E_{substrate - O_2/C_2H_5OH} - E_{substrate} - E_{O_2/C_2H_5OH}$$

where  $E_{substrate - O_2/C_2H_5OH}$  and  $E_{substrate}$  are the total energies for substrate- $O_2/C_2H_5OH$  composites and substrate, respectively.  $E_{O_2/C_2H_5OH}$  is the energy of the isolated  $O_2/C_2H_5OH$ .

### Dissolved oxygen (DO)

The dissolved oxygen concentration in the solution was tested by dissolved oxygen meter (Shanghai Yoke Instrument Limited Company, L-512). First, the DO value in the ethanol solution was tested. And then the catalyst was added into the

solution. After stirring for 30 min under dark conditions, the DO in the reaction solution was tested. The white LED light was turned on immediately. The photocatalytic reaction was performed for 1 h at a 15-min interval for the DO testing.

## Results Section

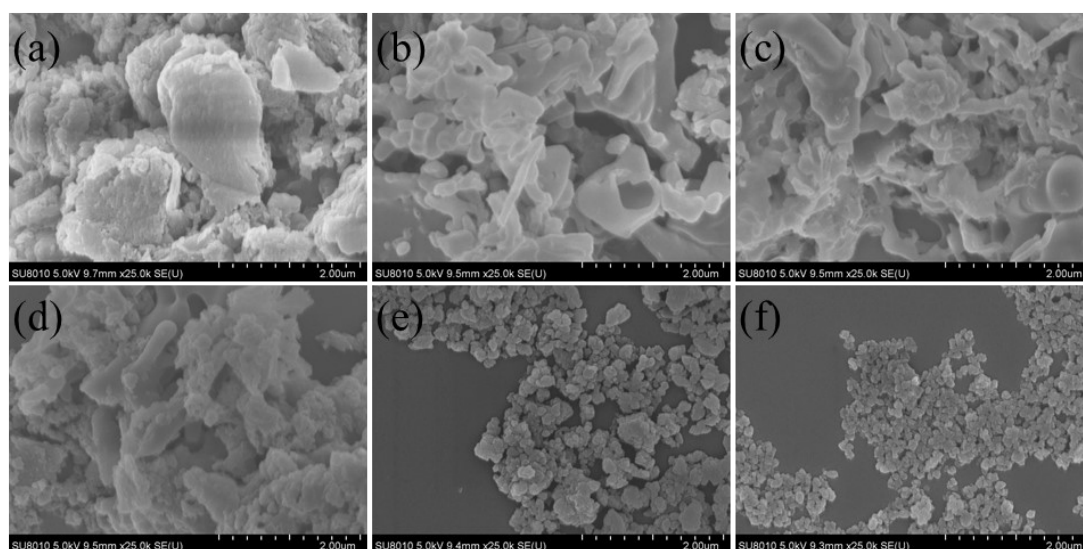

**Fig. S1** SEM images of obtained PCN: (a) CN, (b) CN-0, (c) CNR-0.3, (d) CNR-0.5, (e) CNR-0.7, (f) CNR-0.9.

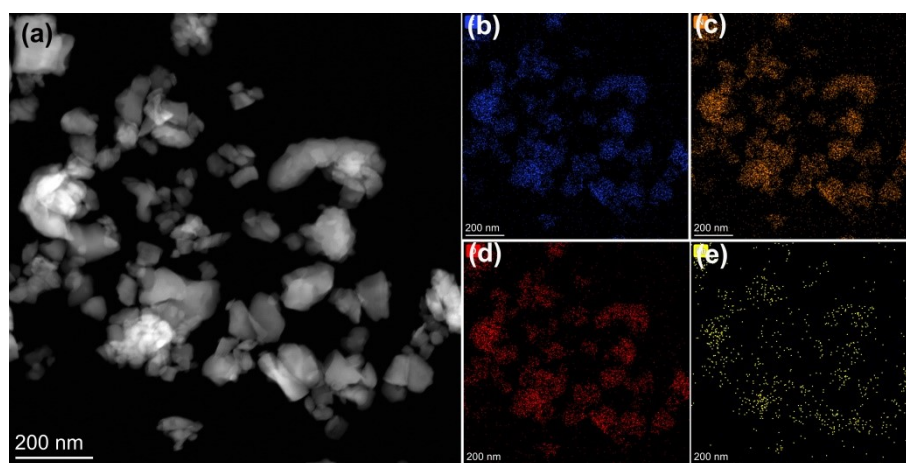

**Fig. S2** (a) HAADF-STEM image, (b) C elemental mapping image, (c) N elemental mapping image, (d) O elemental mapping image, (e) Rb elemental mapping image of

CNR-0.5.

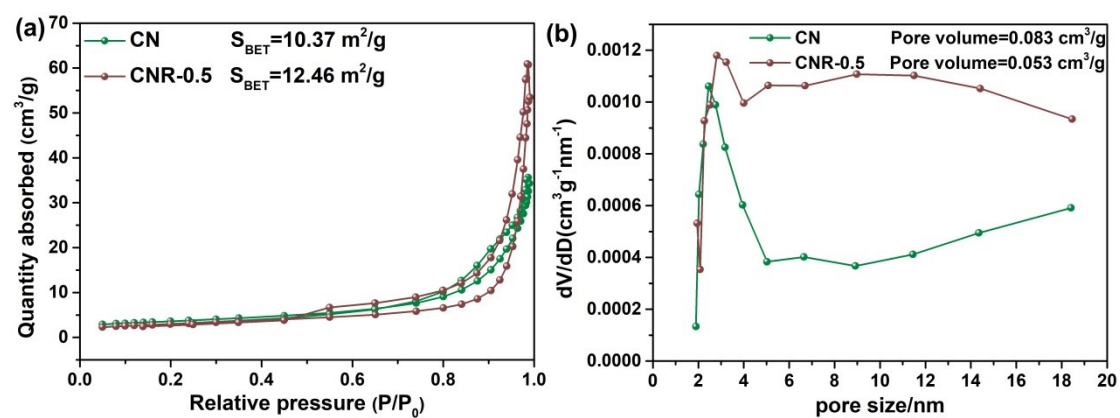

**Fig. S3** (a)  $N_2$  adsorption-desorption isotherms. (b) the pore size distribution curves of CN and CNR-0.5.

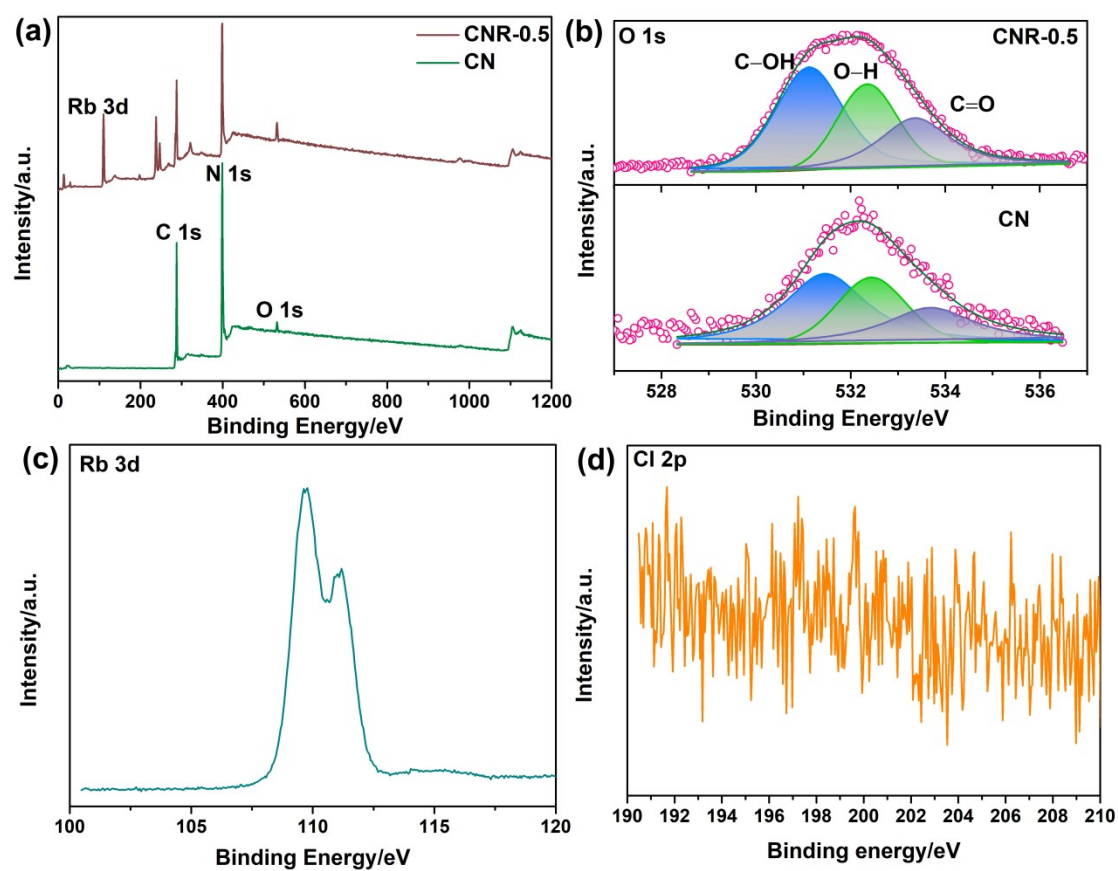

**Fig. S4** (a) XPS survey of CN and CNR-0.5. (b) High-resolution XPS spectra of O 1s of CN and CNR-0.5. (c) High-resolution XPS spectrum of Rb 3d of CNR-0.5. (d)



High-resolution XPS spectrum of Cl 2p of CNR-0.5.

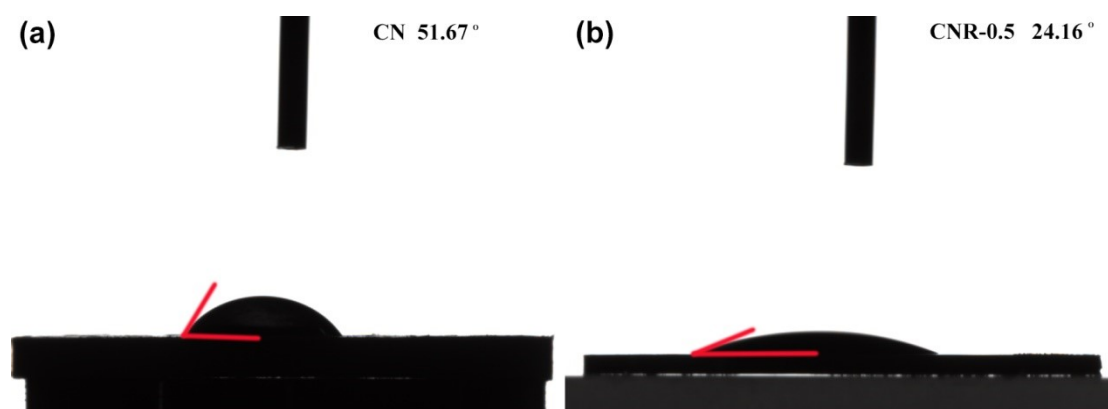

**Fig. S5** Digital images of contact angle tests for CN and CNR-0.5.

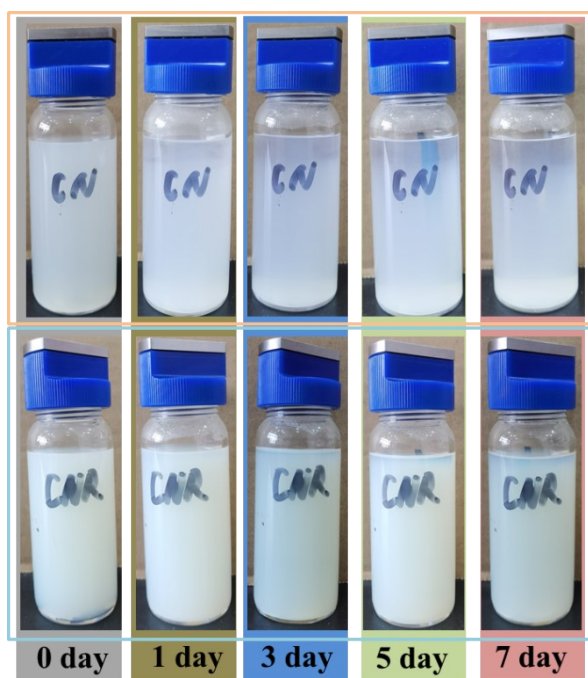

**Fig. S6** The photographs of CN and CNR-0.5 dispersed in deionized water for 7 days.

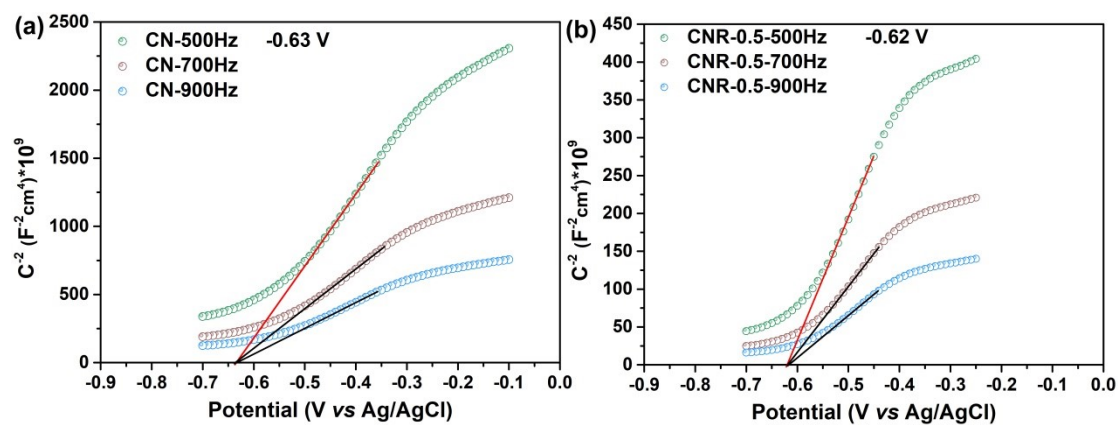

Fig. S7 Mott-Schottky plots in 0.5 M  $Na_2SO_4$  and 0.2 M phosphate buffer electrolyte.

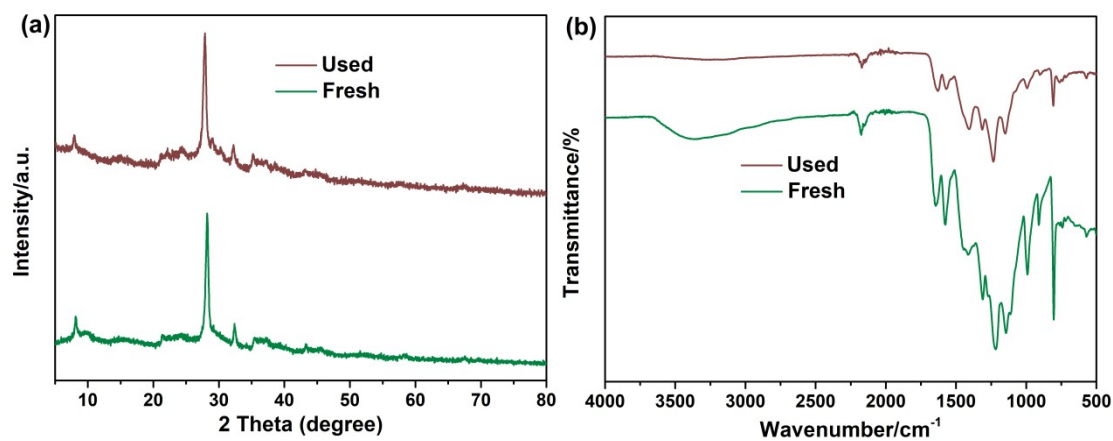

Fig. S8 XRD patterns and FT-IR spectra of the fresh and used CNR-0.5.

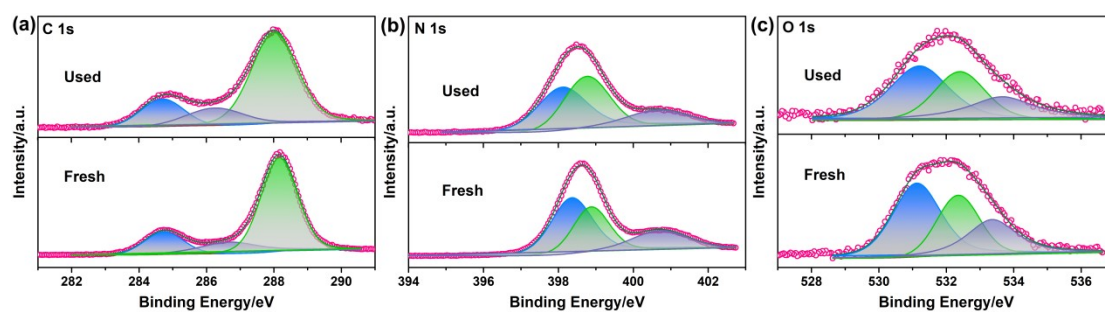

Fig. S9 High-resolution XPS spectra of the fresh and used CNR-0.5.

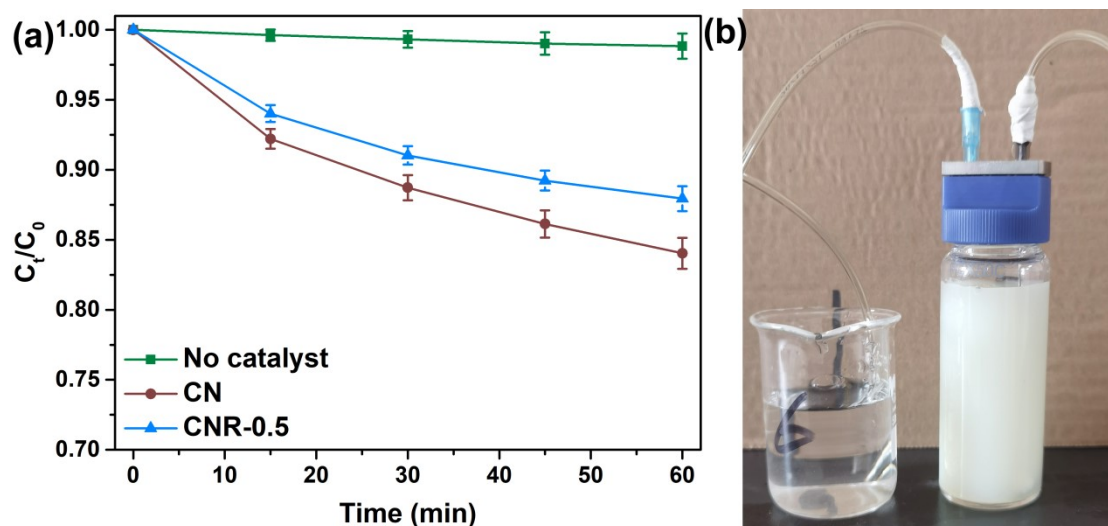

**Fig. S10** (a) The photocatalytic decomposition of H<sub>2</sub>O<sub>2</sub> for CN and CNR-0.5 under LED white light. (b) The test device of photocatalytic decomposition. The initial concentration of H<sub>2</sub>O<sub>2</sub> is 1 mM. And the detailed operation is that 0.01 g of the photocatalyst is adequately dispersed in 50 mL distilled water. After bubbling N<sub>2</sub> for 5 min, the reaction bottle is sealed (as shown in Fig.S10b) and turn on LED light. N<sub>2</sub> enters from the right tube and exits from the left. When collecting the reaction solution, 1.5 mL reaction solution is drawn by injector from the right tube. The photocatalytic decomposition is performed for 1 h with a 15-min interval for sample collection. The H<sub>2</sub>O<sub>2</sub> concentration was determined by the colorimetric method, which is based on the peroxidase (POD)-catalyzed oxidation of N, N-diethyl-*p*-phenylenediamine (DPD) by hydrogen peroxide.

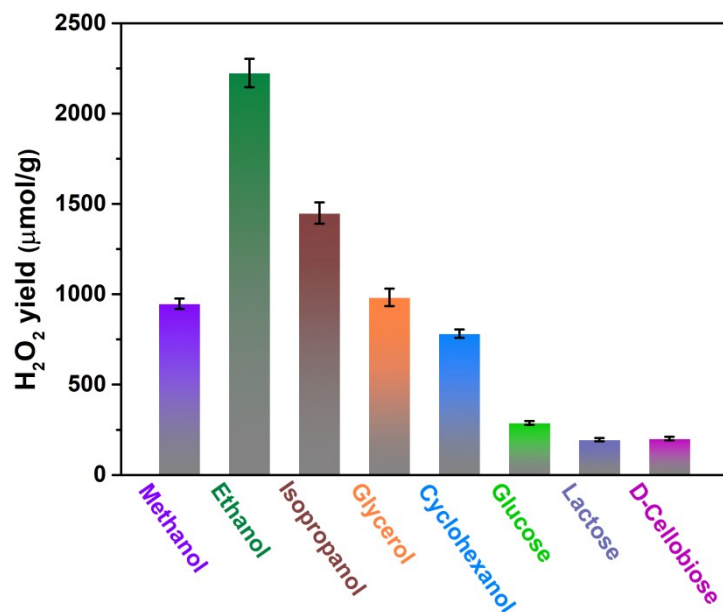

**Fig. S11** Photocatalytic H<sub>2</sub>O<sub>2</sub> production of CNR-0.5 with different additives under white LED light.

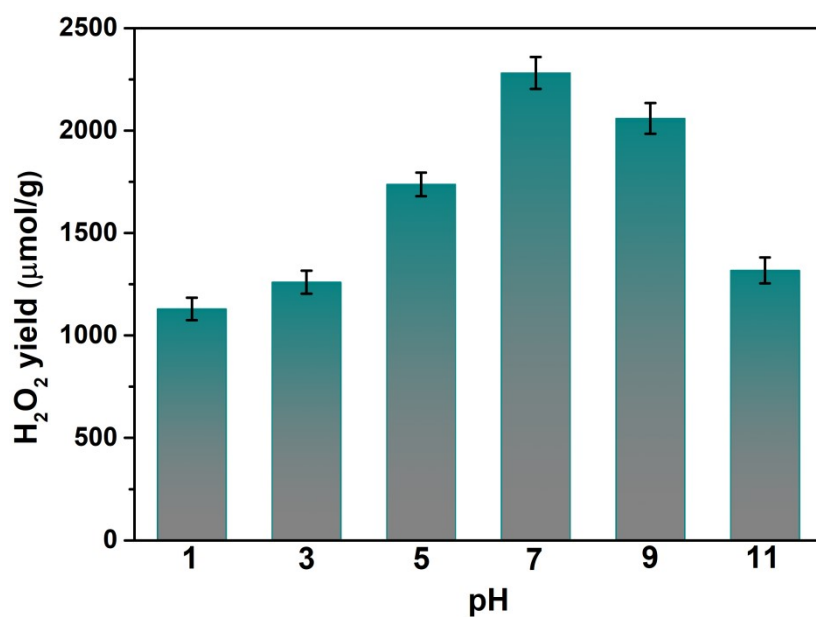

**Fig. S12** The photocatalytic H<sub>2</sub>O<sub>2</sub> production of CNR-0.5 at different pH values under LED white light irradiation.

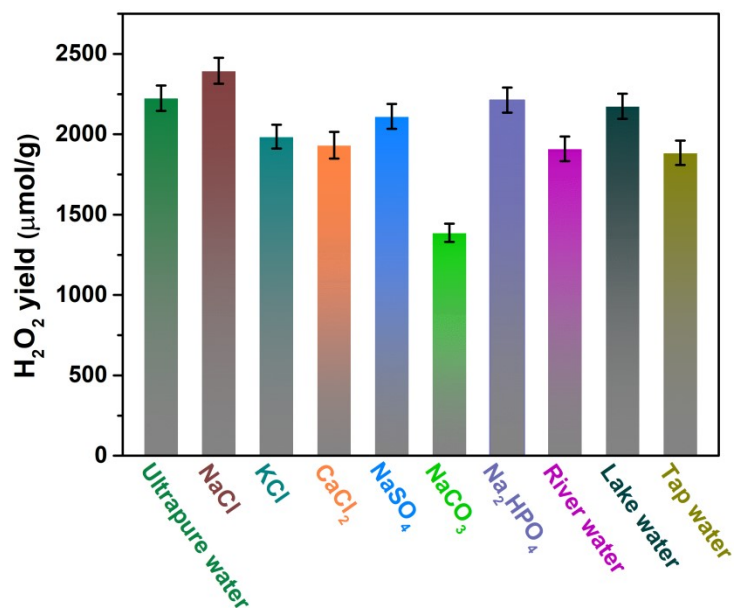

**Fig. S13** Effect of different water sources, cations and anions on the photocatalytic H<sub>2</sub>O<sub>2</sub> production of CNR-0.5 under LED white light irradiation.

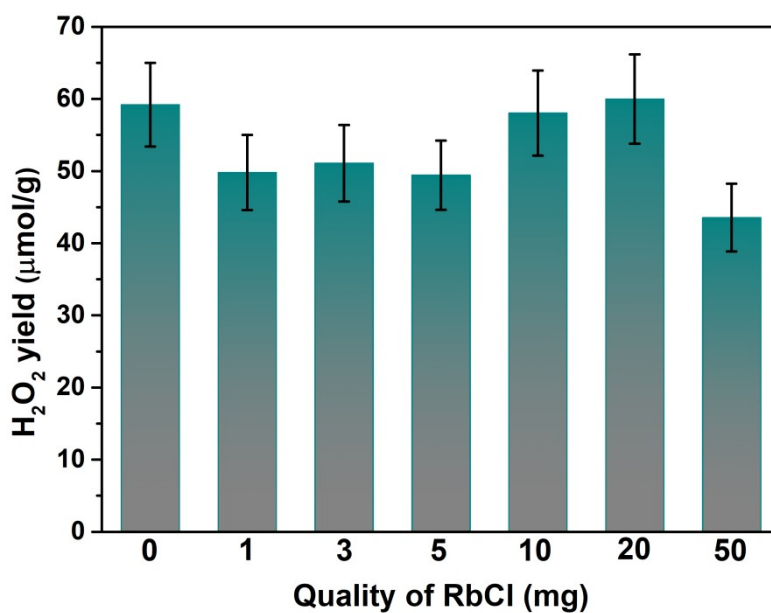

**Fig. S14** The photocatalytic H<sub>2</sub>O<sub>2</sub> production of CN with RbCl under LED white light irradiation.

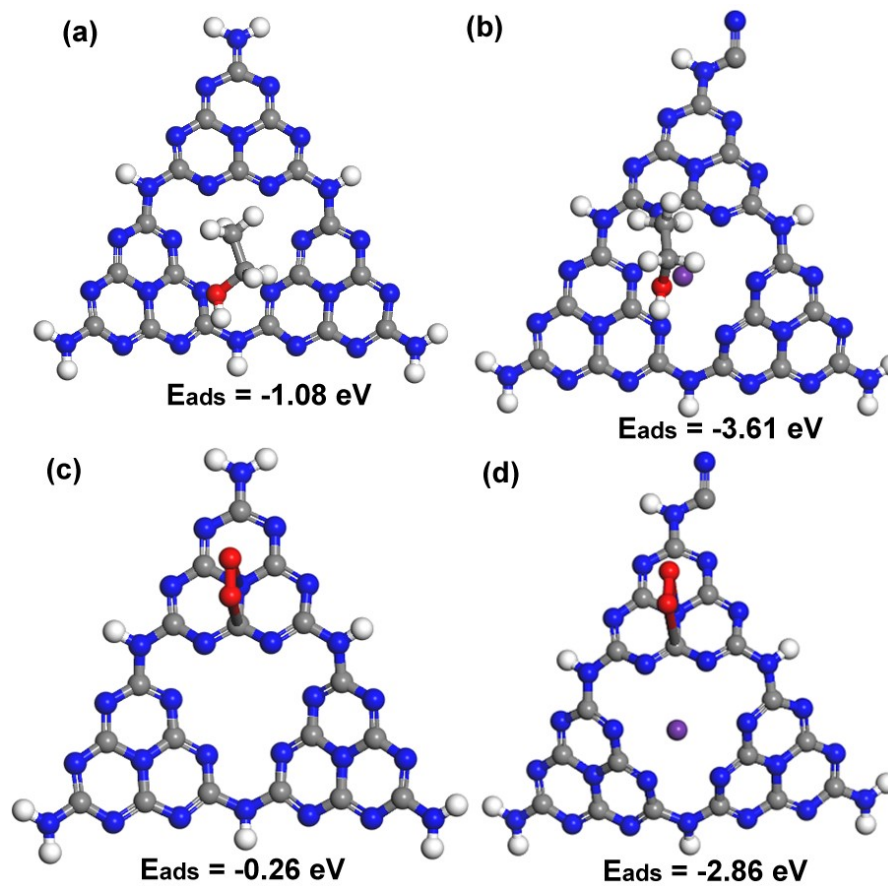

**Fig. S15** Top views of optimized geometries for adsorbed molecular ethanol and  $O_2$  on CN and CNR-0.5. (a) CN-ethanol; (b) CNR-0.5-ethanol; (c) CN- $O_2$ ; (d) CNR-0.5- $O_2$ .

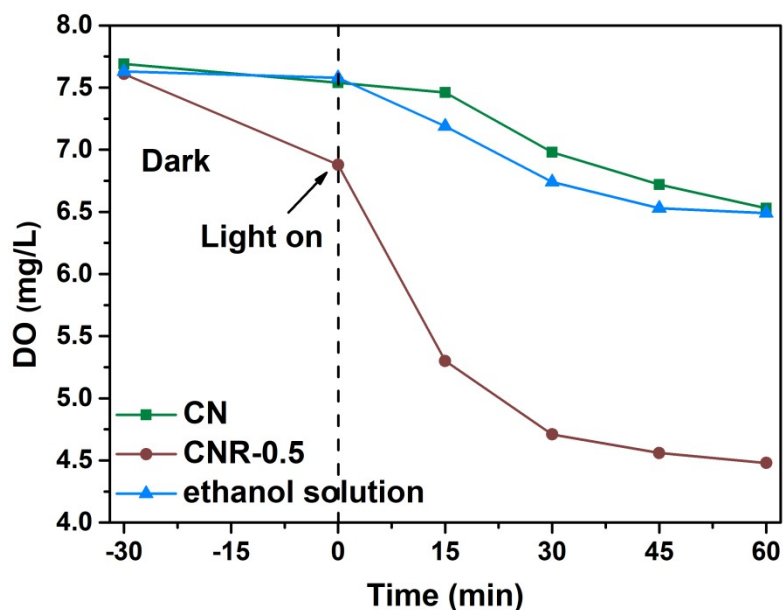

**Fig. S16** The dissolved oxygen (DO) concentrations of reaction solution for CN, CNR-0.5, and without catalyst.

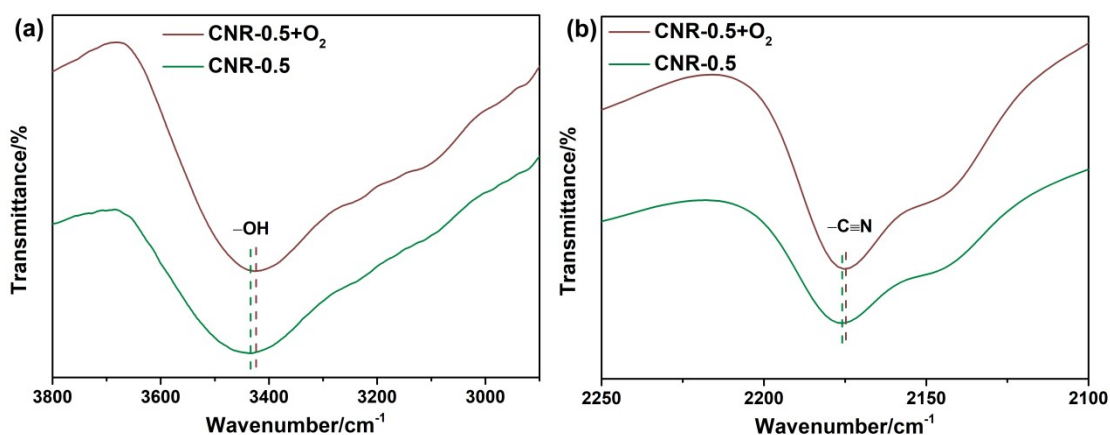

**Fig. S17** The FTIR-ATR (attenuated total reflection) spectroscopic study of CNR-0.5 before and after  $O_2$  adsorption. (a)  $-C\equiv N$  group; (b)  $-OH$  group. Namely, CNR-0.5 is placed in a vacuum drying oven for dehydration and degassing. Take a part of the sample into a 5 mL centrifuge tube and continuously inject oxygen for 5 min. And then, the FTIR-ATR spectra of them are measured quickly. From the results, after  $O_2$  adsorption, the peaks of  $-C\equiv N$  group and  $-OH$  group show a right-shift slightly,



which may be caused by  $O_2$  adsorption of  $-C\equiv N/-OH$  groups.

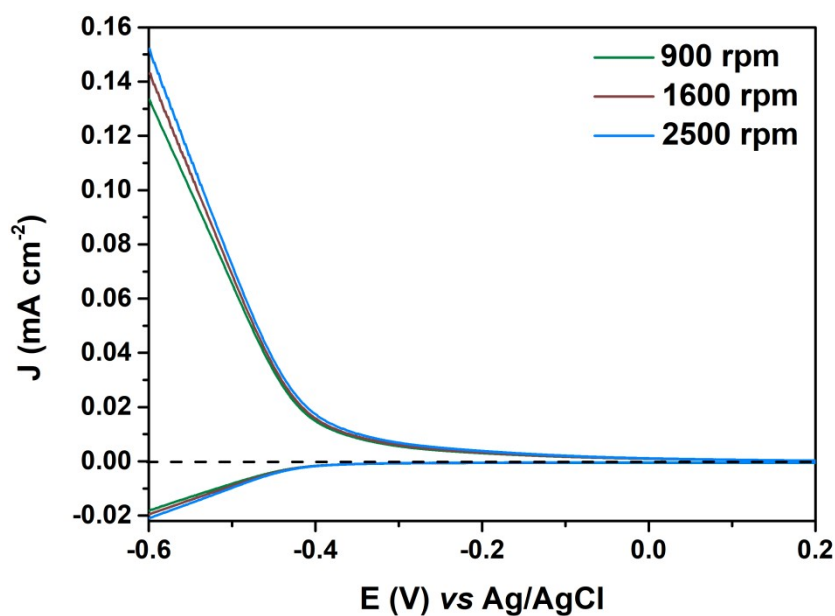

**Fig. S18** The RRDE polarization curves of CNR-0.5 at different rotating speeds in  $O_2$ -saturated electrolyte along with the ring current and disc current.

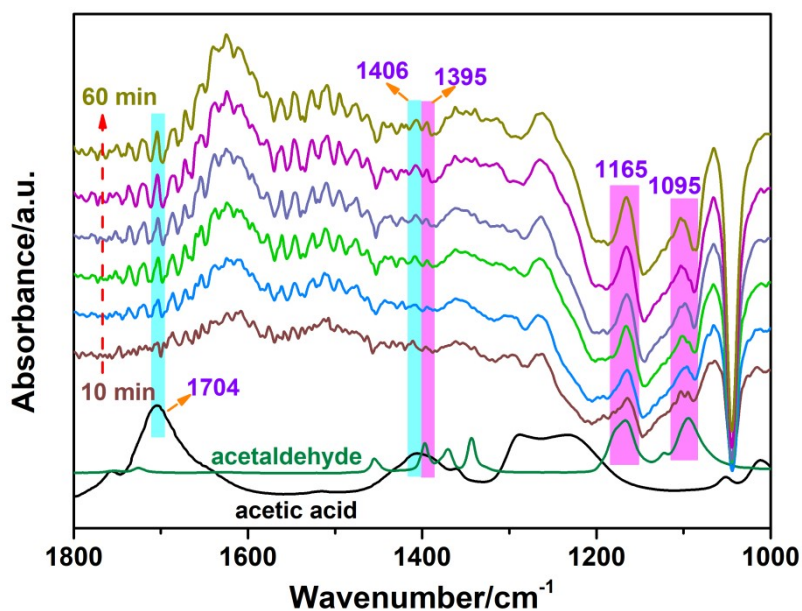

**Fig. S19** *In situ* diffuse reflectance infrared Fourier transform spectroscopy of CNR-0.4. The IR spectrum was collected with interval times of 10 min under illumination.



And the spectra of acetic acid and acetaldehyde were obtained by measuring the FT-IR of acetic acid and acetaldehyde, respectively. From the results, we can find that the characteristic peaks of acetaldehyde increase gradually with the reaction time. Furthermore, after 20 min, the characteristic peaks of acetic acid appeared. It can be inferred that ethanol is oxidized to acetaldehyde and a small amount of acetic acid during the reaction.

**Table S1.** Physicochemical properties of the as-prepared samples.

| Sample  | S <sub>BET</sub> (m <sup>2</sup> /g) | Pore volume (cm <sup>3</sup> /g) |
|---------|--------------------------------------|----------------------------------|
| CN      | 10.37                                | 0.094                            |
| CN-0    | 23.15                                | 0.17                             |
| CNR-0.3 | 6.59                                 | 0.037                            |
| CNR-0.5 | 12.46                                | 0.055                            |
| CNR-0.7 | 36.09                                | 0.21                             |
| CNR-0.9 | 58.11                                | 0.27                             |

**Table S2** XPS peak area ratio of the as-prepared samples.

| Sample  | N 1s   |                    |        | Rb (%) <sup>1</sup> | Cl (%) | Rb (%) <sup>2</sup> |
|---------|--------|--------------------|--------|---------------------|--------|---------------------|
|         | C-N=C  | N-(C) <sub>3</sub> | C-N-H  |                     |        |                     |
| CN      | 49.39% | 33.94%             | 16.67% | -                   | -      |                     |
| CNR-0.5 | 48.31% | 32.88%             | 18.81% | 2.06                | trace  | 21.27               |

Rb (%)<sup>1</sup> means mole percentage from XPS, Rb (%)<sup>2</sup> is mass percentage from inductively coupled plasma (ICP).

**Table S3.** The adsorption energies of PCN with O<sub>2</sub> and ethanol.

| Adsorption                                                                        | E <sub>ads</sub> (eV) |
|-----------------------------------------------------------------------------------|-----------------------|
| CN + O <sub>2</sub> = CN-O <sub>2</sub>                                           | -0.26                 |
| CN + CH <sub>3</sub> CH <sub>2</sub> OH = CN-CH <sub>3</sub> CH <sub>2</sub> OH   | -1.08                 |
| CNR + O <sub>2</sub> = CNR-O <sub>2</sub>                                         | -2.86                 |
| CNR + CH <sub>3</sub> CH <sub>2</sub> OH = CNR-CH <sub>3</sub> CH <sub>2</sub> OH | -3.61                 |

**Table S4.** Comparison of the photocatalytic activity of the as-prepared CNR-0.5 with other reported PCN-based photocatalysts.

| Samples                                 | Light                                       | Sacrificial agent | ORR ( $\mu\text{mol h}^{-1} \text{g}^{-1}$ ) | AQE % | Ref.      |
|-----------------------------------------|---------------------------------------------|-------------------|----------------------------------------------|-------|-----------|
| Nv-C $\equiv$ N-CN                      | 400                                         | IPA 10%<br>pH=3   | -                                            | 36.2  | 7         |
| PCN-NaCA-2                              | 380                                         | IPA 10%           | -                                            | 27.6  | 8         |
| PCN-NaCA-2                              | 420                                         | IPA 10%           | -                                            | 11.8  | 8         |
| ORP/GCN                                 | $\lambda > 420$                             | Pure water        | $\sim 165$                                   | -     | 9         |
| AQ/U-POCN                               | 400-780                                     | Pure water        | 150                                          | -     | 10        |
| g-C <sub>3</sub> N <sub>4</sub> /500-85 | $\lambda > 420$                             | Pure water        | $\sim 90$                                    | -     | 11        |
| CNOP                                    | $\lambda > 420$                             | Pure water        | $\sim 66.67$                                 | -     | 12        |
| CNOP                                    | 420                                         | Pure water        | -                                            | 2.5   | 12        |
| KNiCN                                   | $\lambda > 420$                             | Pure water        | 398                                          | -     | 13        |
| <b>CNR-0.5</b>                          | 420                                         | Ethanol 10%       | 5802                                         | 13.25 | This work |
| <b>CNR-0.5</b>                          | 385                                         | Ethanol 10%       | 8295                                         | 24.52 | This work |
| <b>CNR-0.5</b>                          | LED white light<br>20.46 mW/cm <sup>2</sup> | Pure water        | 329.90                                       | -     | This work |

## REFERENCES

1. L. Shi, L. Yang, W. Zhou, Y. Liu, L. Yin, X. Hai, H. Song and J. Ye, *Small*, 2018, **14**, 1703142-1703150.
2. G. Kresse and J. Furthmüller, *Comp. Mater. Sci.*, 1996, **6**, 15-50.
3. G. Kresse and J. Furthmüller, *Phys. Rev. B*, 1996, **54**, 11169-11186.
4. J. P. Perdew, K. Burke and M. Ernzerhof, *Phys. Rev. Lett.*, 1996, **77**, 3865-3868.
5. J. P. Perdew, M. Ernzerhof and K. Burke, *J. Chem. Phys.*, 1996, **105**, 9982-9985.
6. G. Kresse and D. Joubert, *Rev. B*, 1999, **59**, 1758-1775.

7. X. Zhang, P. Ma, C. Wang, L. Gan, X. Chen, P. Zhang, Y. Wang, H. Li, L. Wang, X. Zhou and K. Zheng, *Energ. Environ. Sci.*, 2022, **15**, 830-842.
8. Y. Zhao, P. Zhang, Z. Yang, L. Li, J. Gao, S. Chen, T. Xie, C. Diao, S. Xi, B. Xiao, C. Hu and W. Choi, *Nat. Commun.*, 2021, **12**, 3701-3711.
9. J. Zhang, J. Lang, Y. Wei, Q. Zheng, L. Liu, Y.-H. Hu, B. Zhou, C. Yuan and M. Long, *Appl. Catal. B: Environ.*, 2021, **298**, 120522.
10. Y.-X. Ye, C. Wen, J. Pan, J.-W. Wang, Y.-J. Tong, S. Wei, Z. Ke, L. Jiang, F. Zhu, N. Zhou, M. Zhou, J. Xu and G. Ouyang, *Appl. Catal. B: Environ.*, 2021, **285**, 119726.
11. B. Liu, J. Du, G. Ke, B. Jia, Y. Huang, H. He, Y. Zhou and Z. Zou, *Adv. Funct. Mater.*, 2021, DOI: 10.1002/adfm.202111125, 2111125-2111136.
12. H. Kim, K. Shim, K. E. Lee, J. W. Han, Y. Zhu and W. Choi, *Appl. Catal. B: Environ.*, 2021, DOI: 10.1016/j.apcatb.2021.120666, 120666.
13. Y. Chen, X. Yan, J. Xu and L. Wang, *J. Mater. Chem. A*, 2021, **9**, 24056-24063.
